# Supplementary material for: Synthesis and Antifungal Activity of Benzamidine Derivatives Carrying 1,2,3-Triazole Moieties
Source: PubMed Central journal article supplement (PMC6270668; doi:10.3390/molecules19055674), 2014-05-02

# Supplementary Materials

## <sup>1</sup>H-NMR spectrum of compound 2

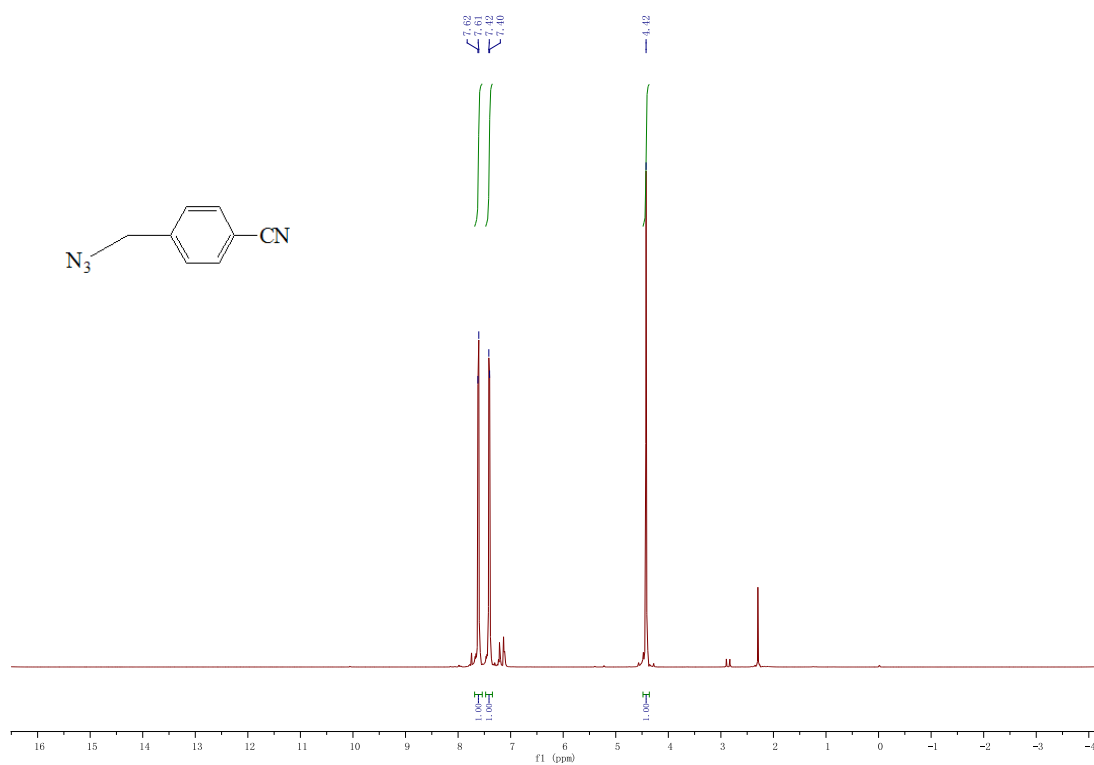

## <sup>13</sup>C-NMR spectrum of compound 2

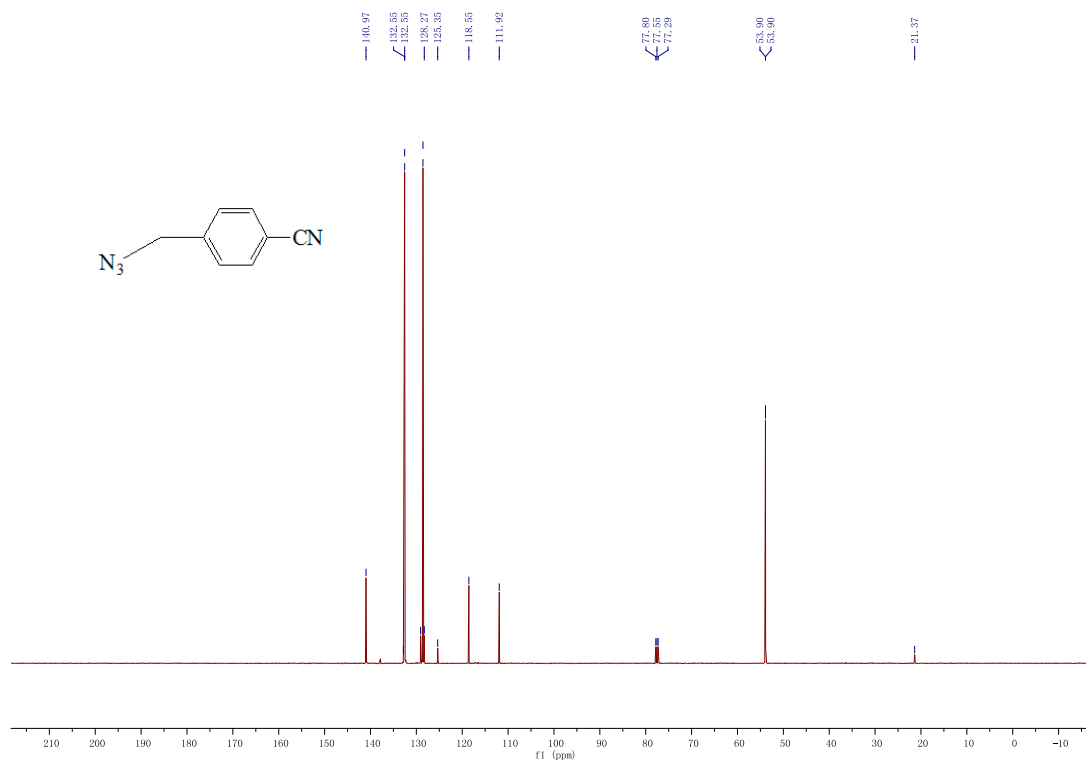

**<sup>1</sup>H-NMR spectrum of compound 3**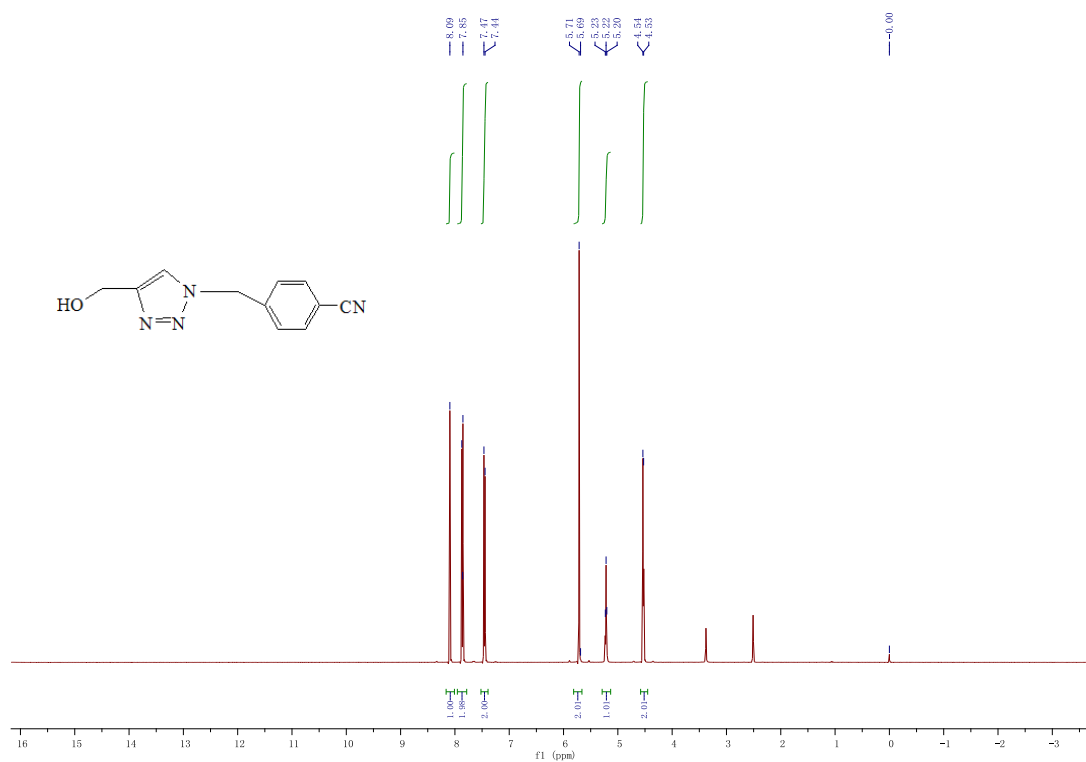**<sup>13</sup>C-NMR spectrum of compound 3**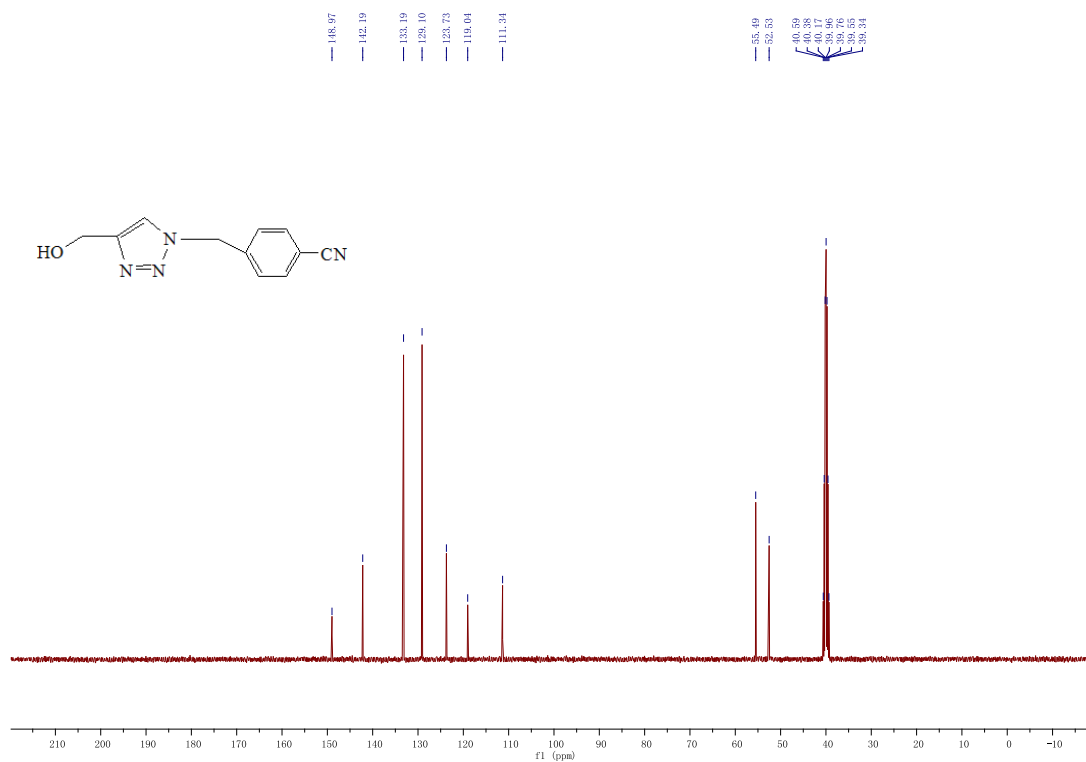

**<sup>1</sup>H-NMR spectrum of compound 4a**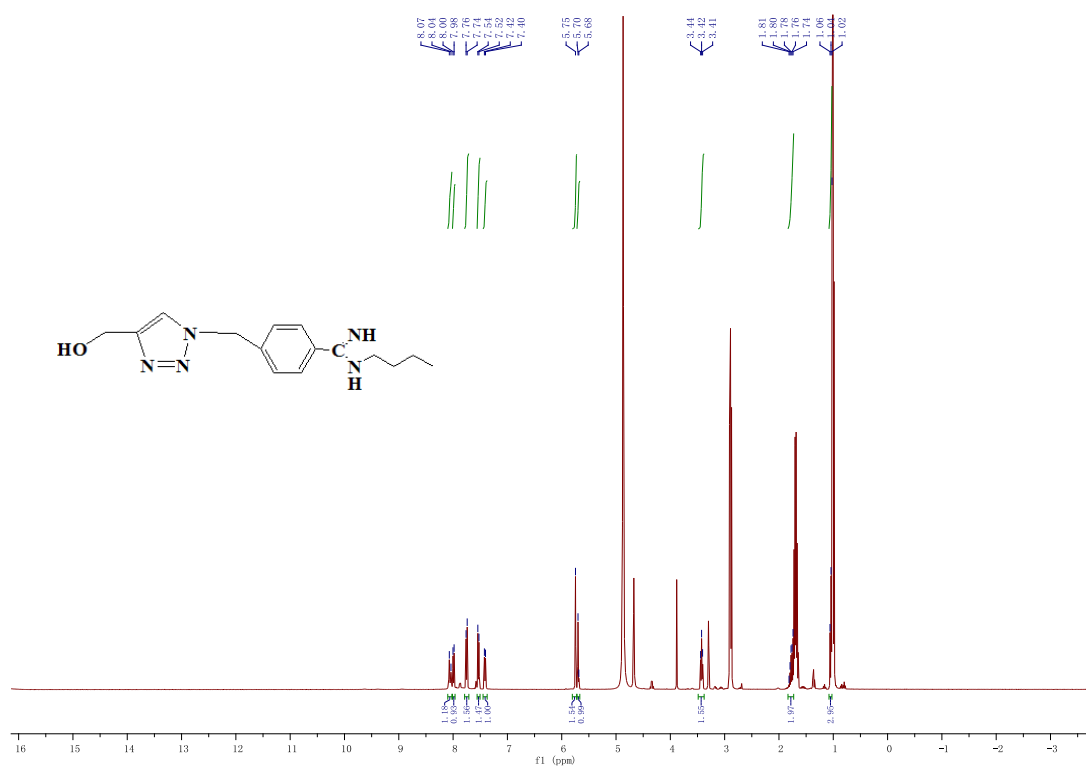**<sup>1</sup>H-NMR spectrum of compound 4b**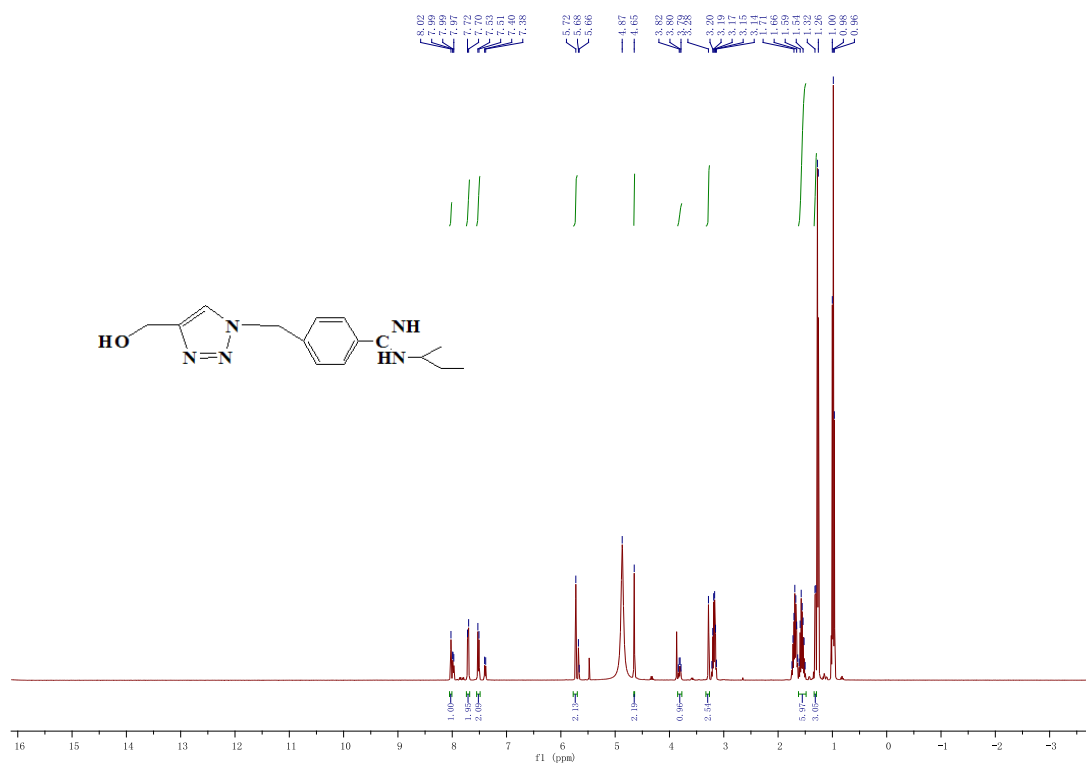

**<sup>1</sup>H-NMR spectrum of compound 7**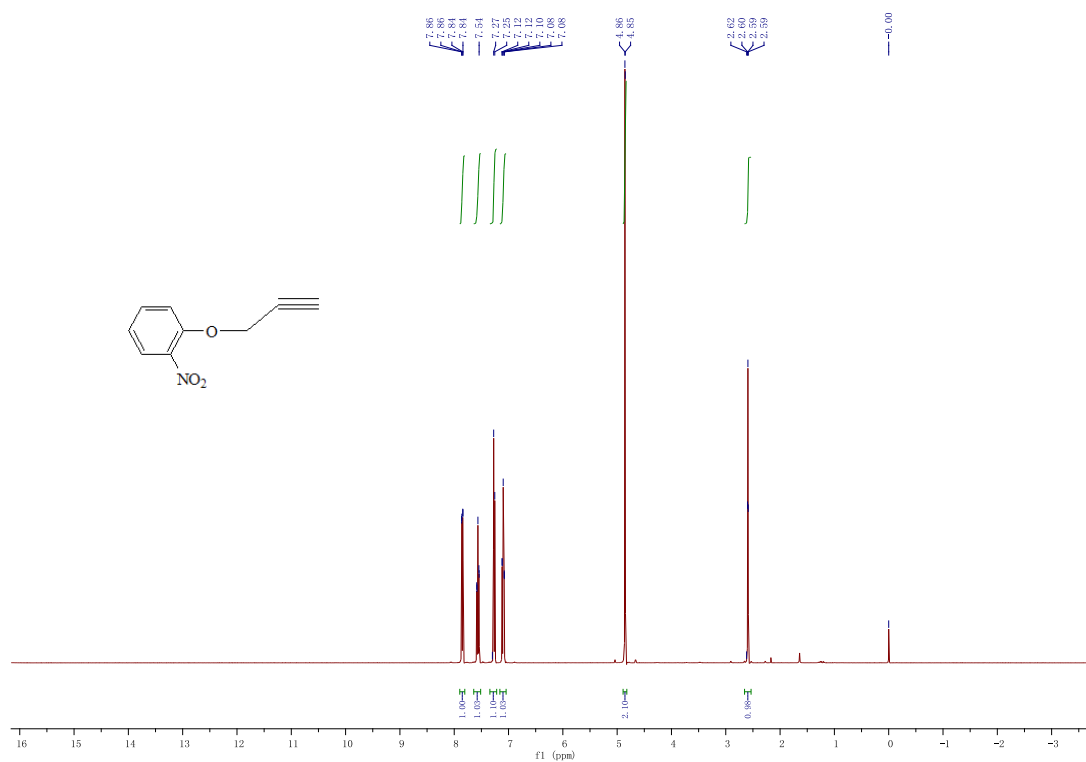**<sup>13</sup>C-NMR spectrum of compound 7**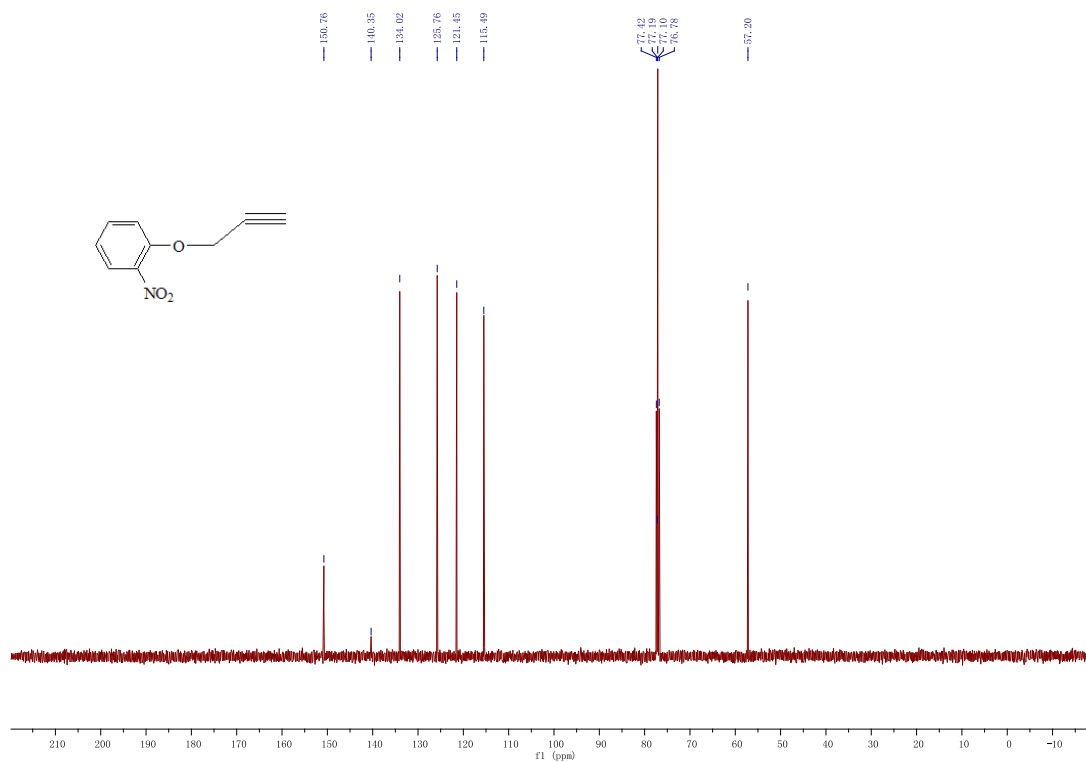

**<sup>1</sup>H-NMR spectrum of compound 8**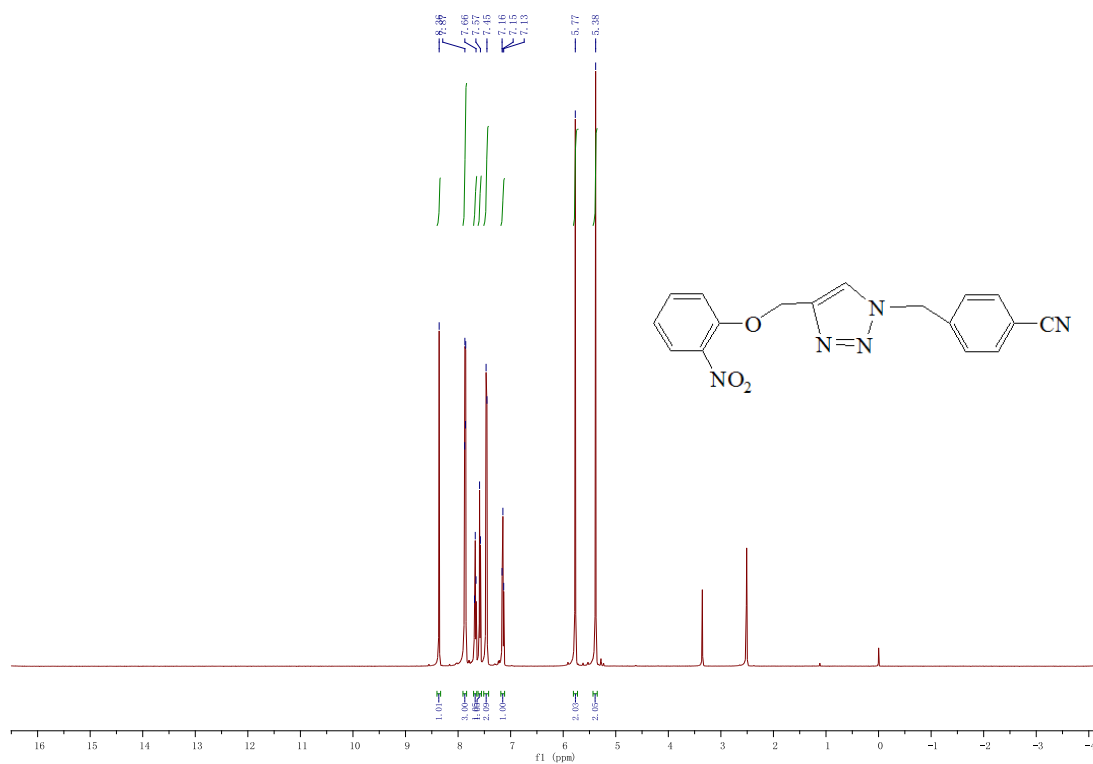**<sup>13</sup>C-NMR spectrum of compound 8**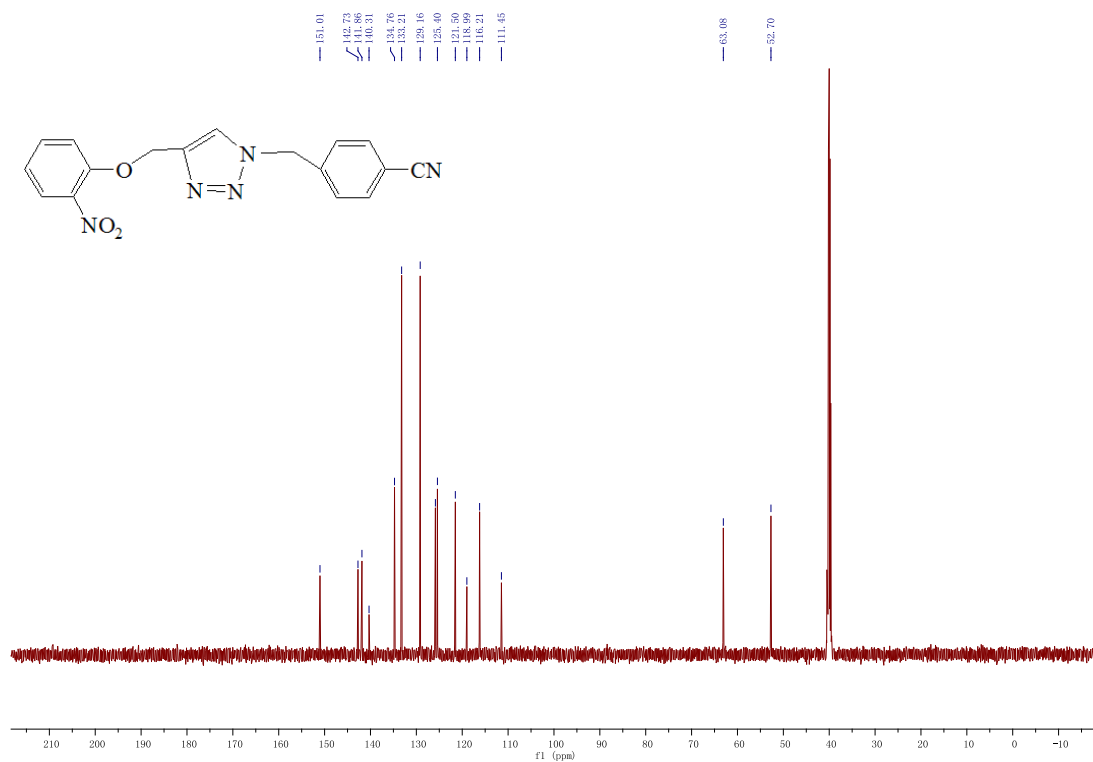

**<sup>1</sup>H-NMR spectrum of compound 9a**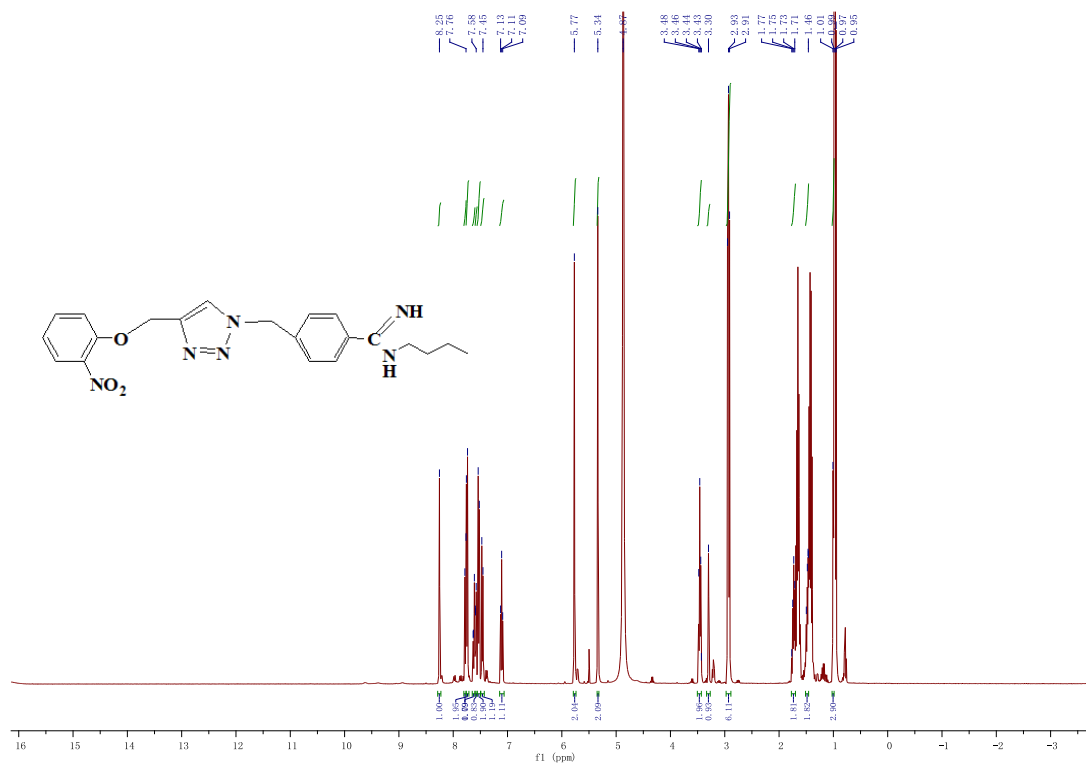**<sup>1</sup>H-NMR spectrum of compound 9b**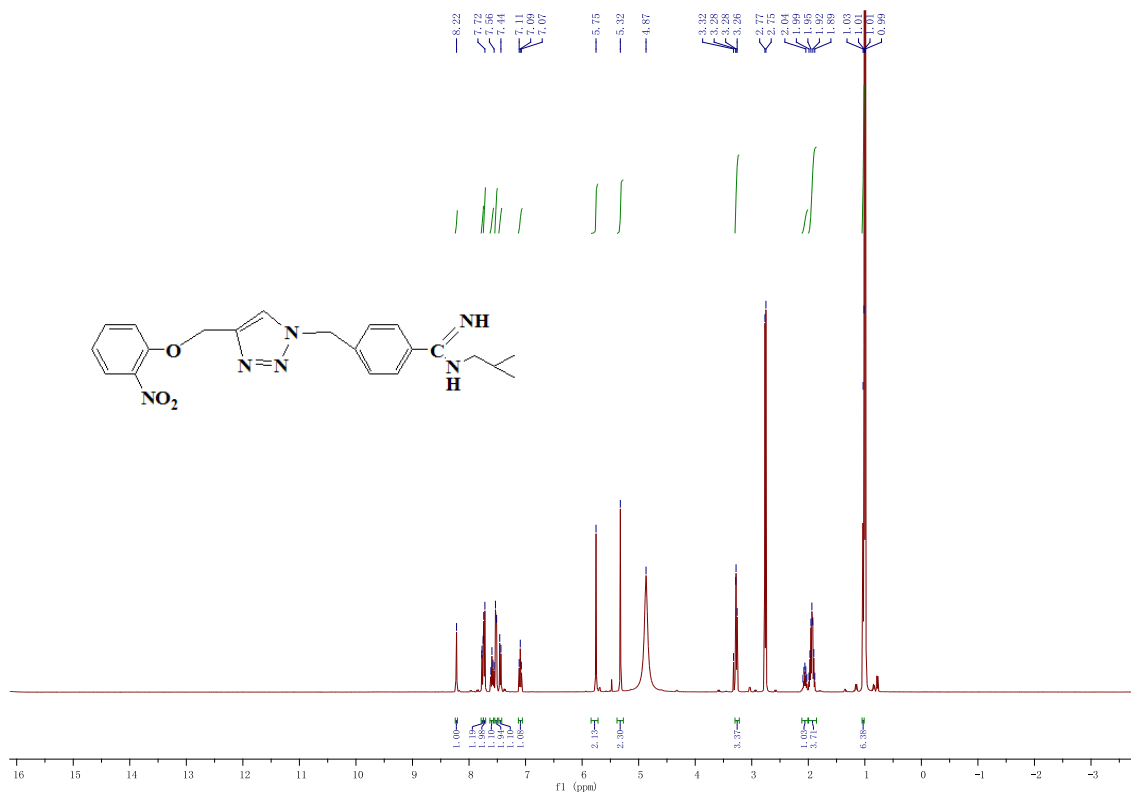

**$^1\text{H-NMR}$  spectrum of compound 14**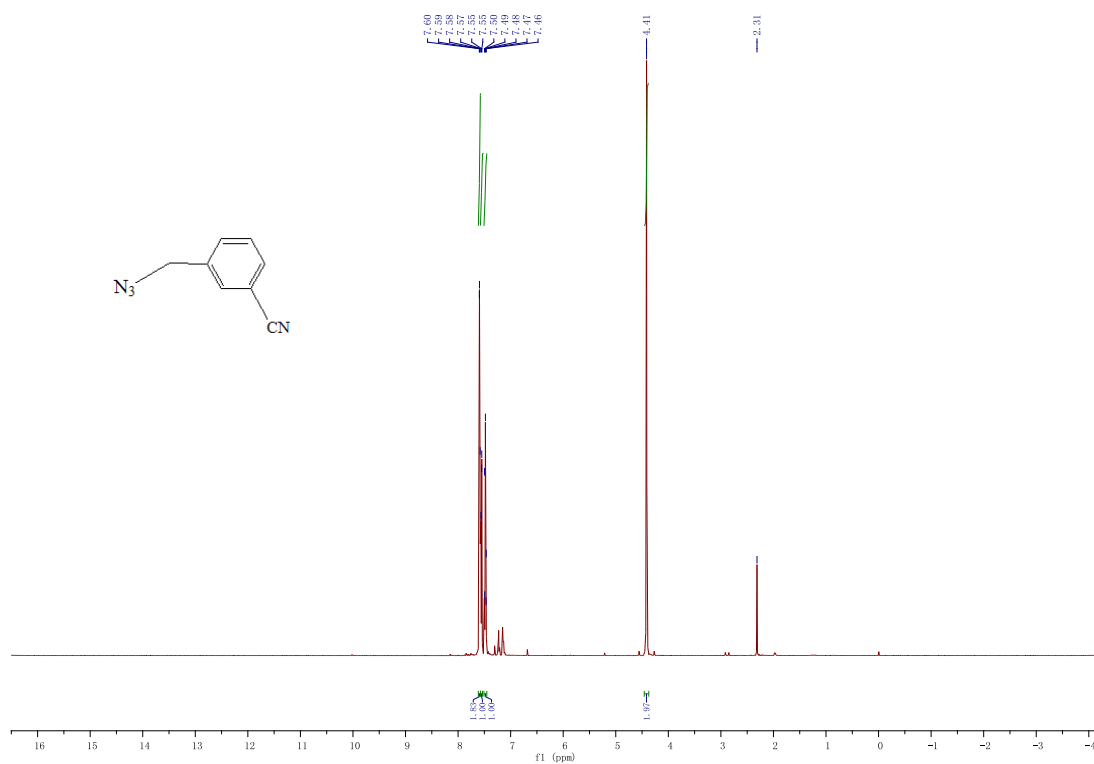 **$^{13}\text{C-NMR}$  spectrum of compound 14**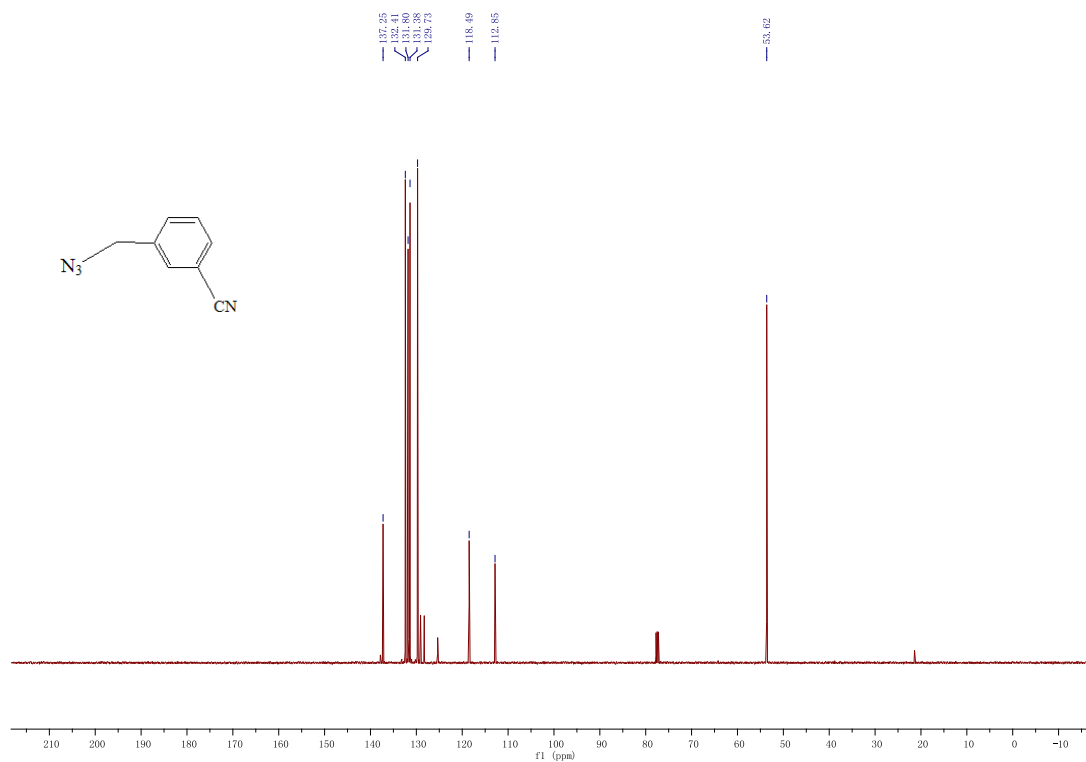

**<sup>1</sup>H-NMR spectrum of compound 15a**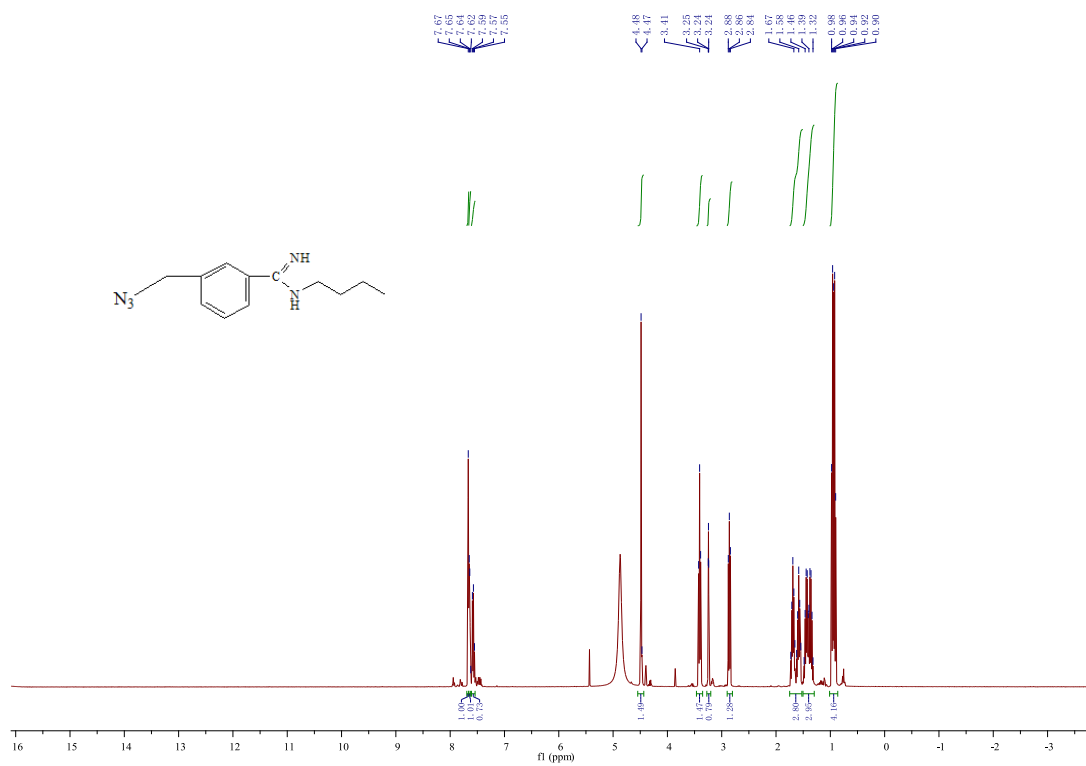**<sup>13</sup>C-NMR spectrum of compound 15a**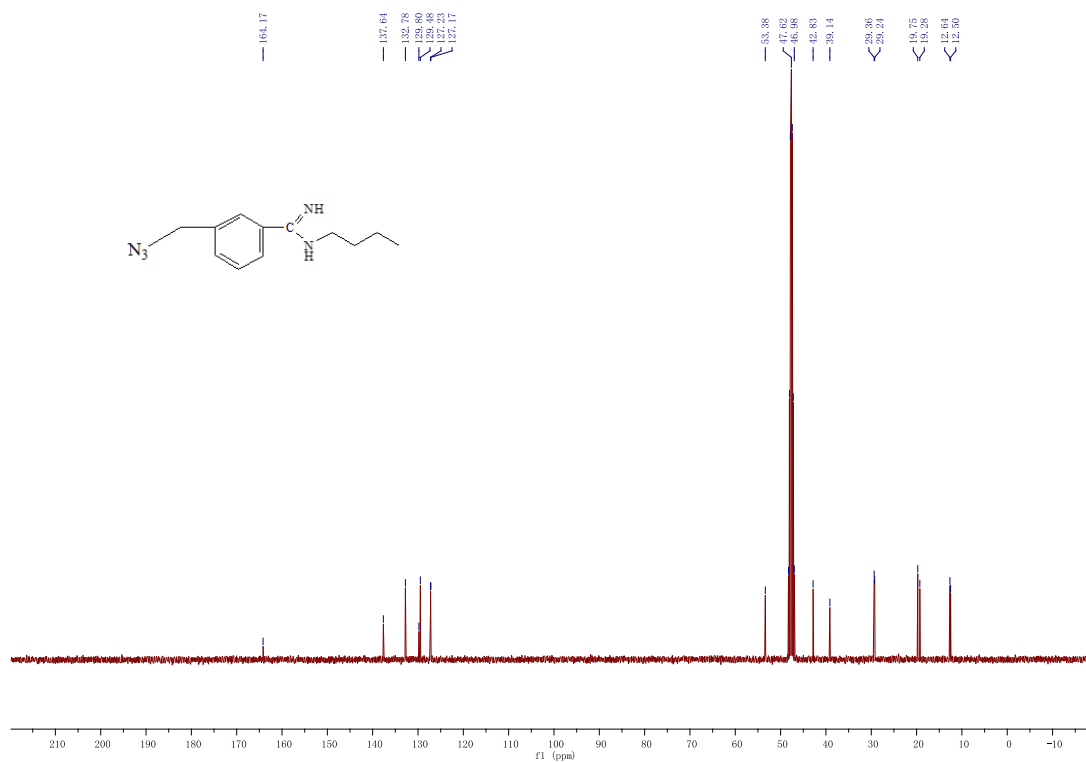



**<sup>1</sup>H-NMR spectrum of compound 15b**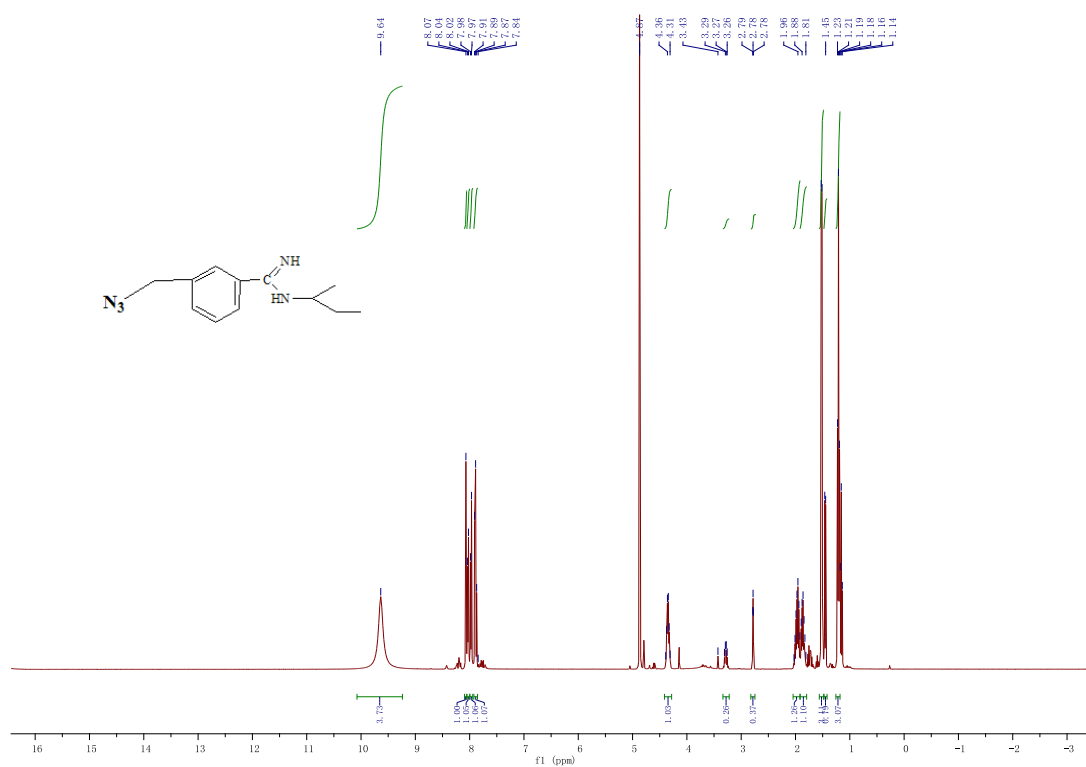**<sup>13</sup>C-NMR spectrum of compound 15b**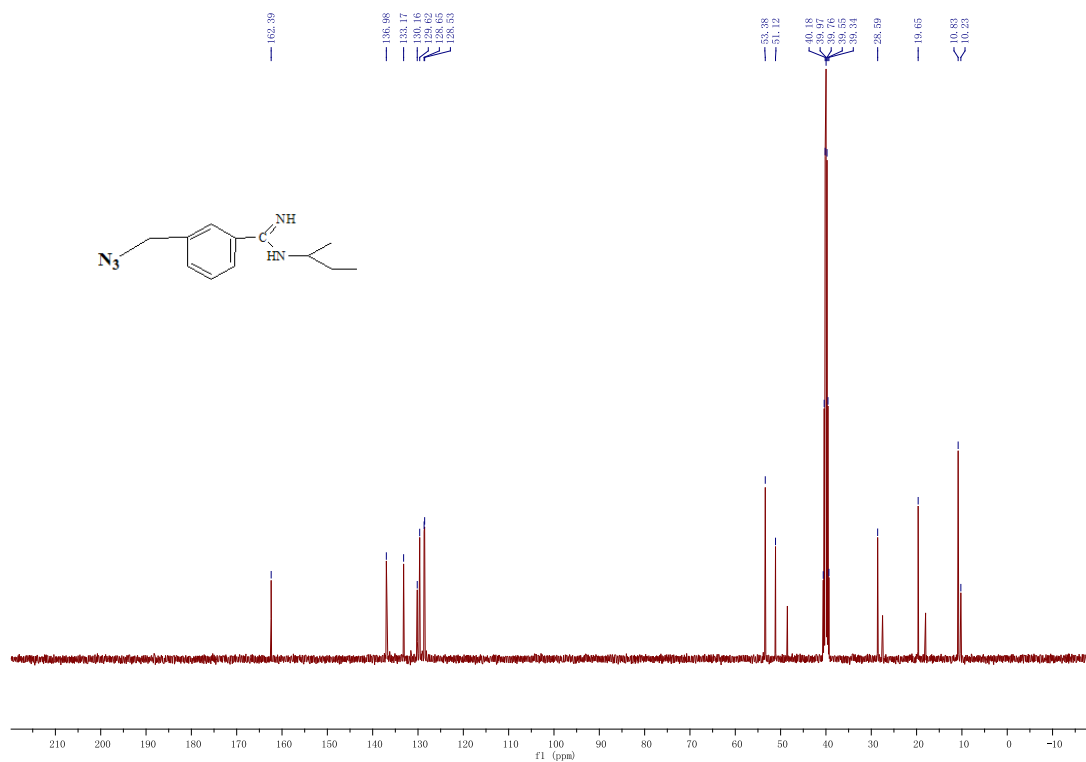

**<sup>1</sup>H-NMR spectrum of compound 16a**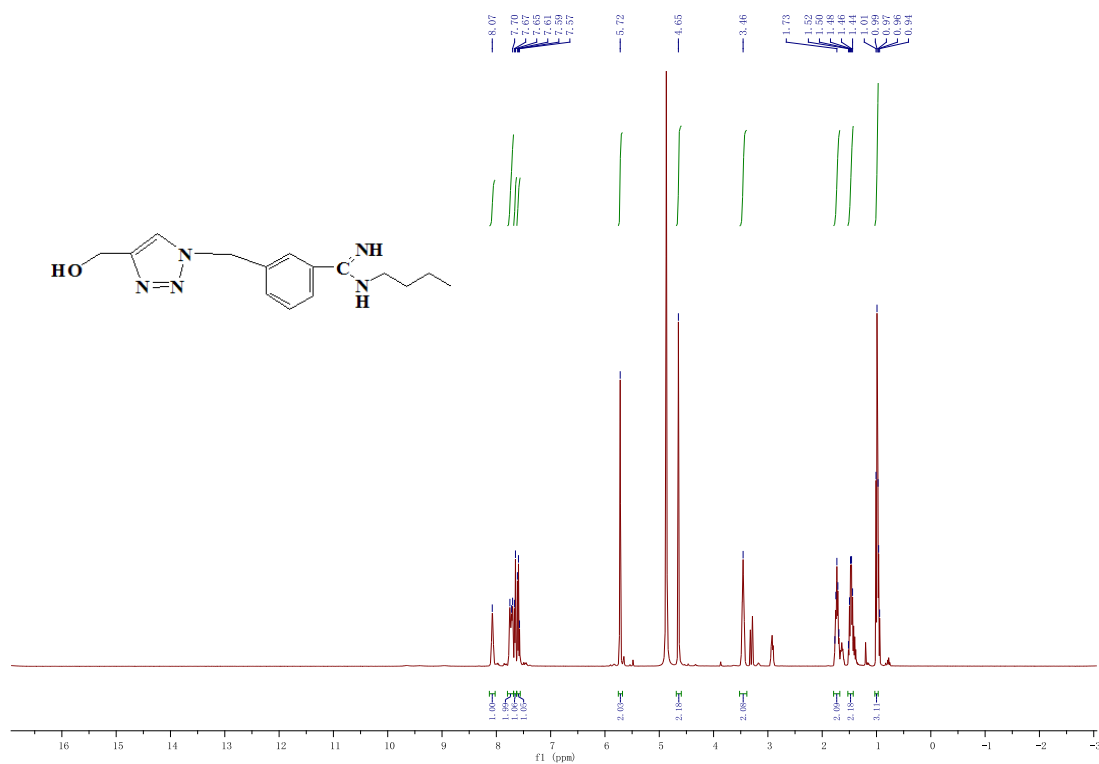**<sup>13</sup>C-NMR spectrum of compound 16a**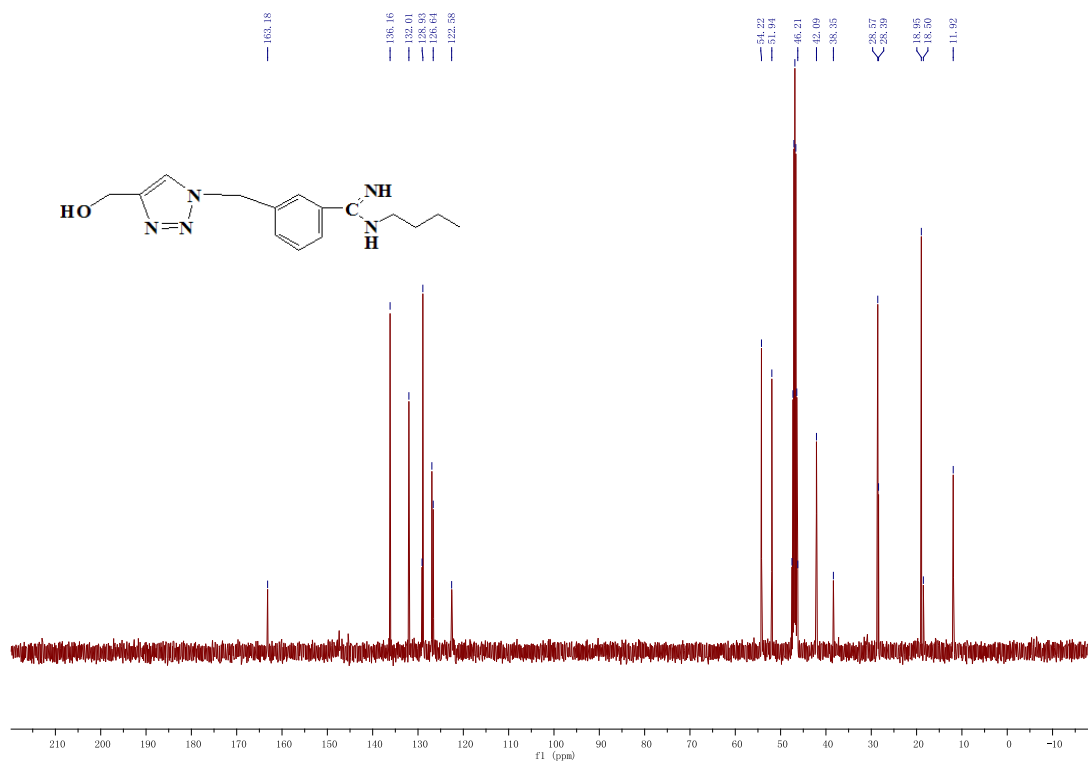

**<sup>1</sup>H-NMR spectrum of compound 16b**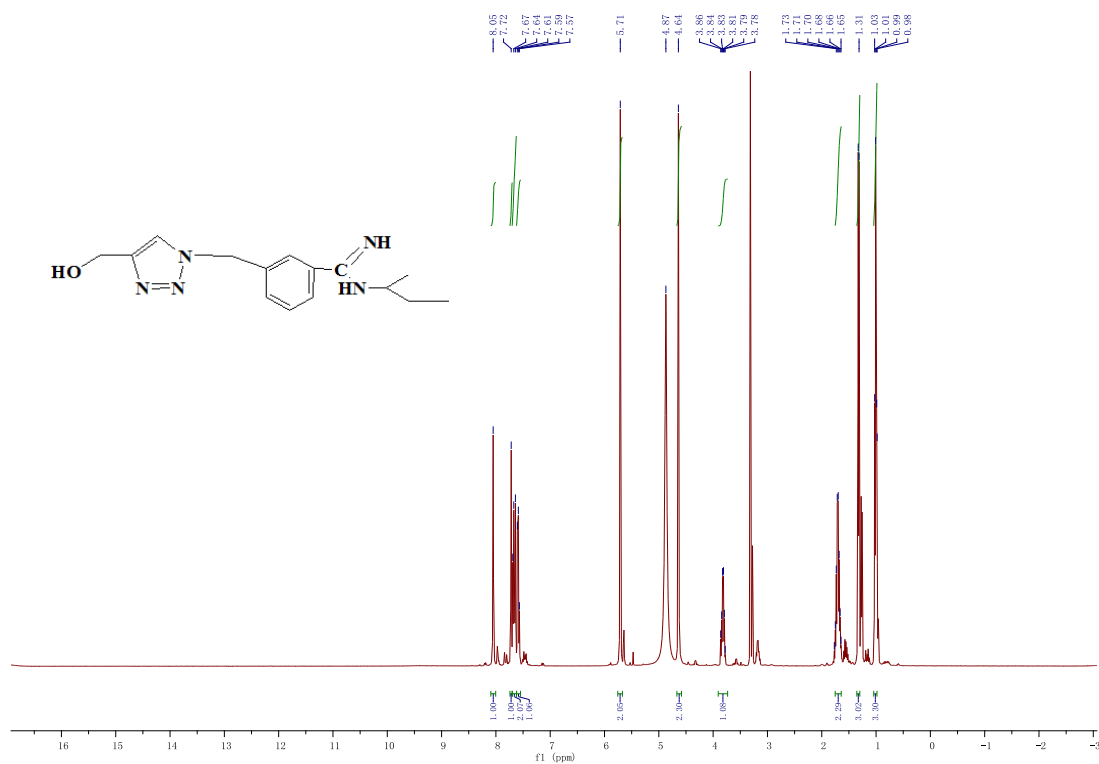**<sup>13</sup>C-NMR spectrum of compound 16b**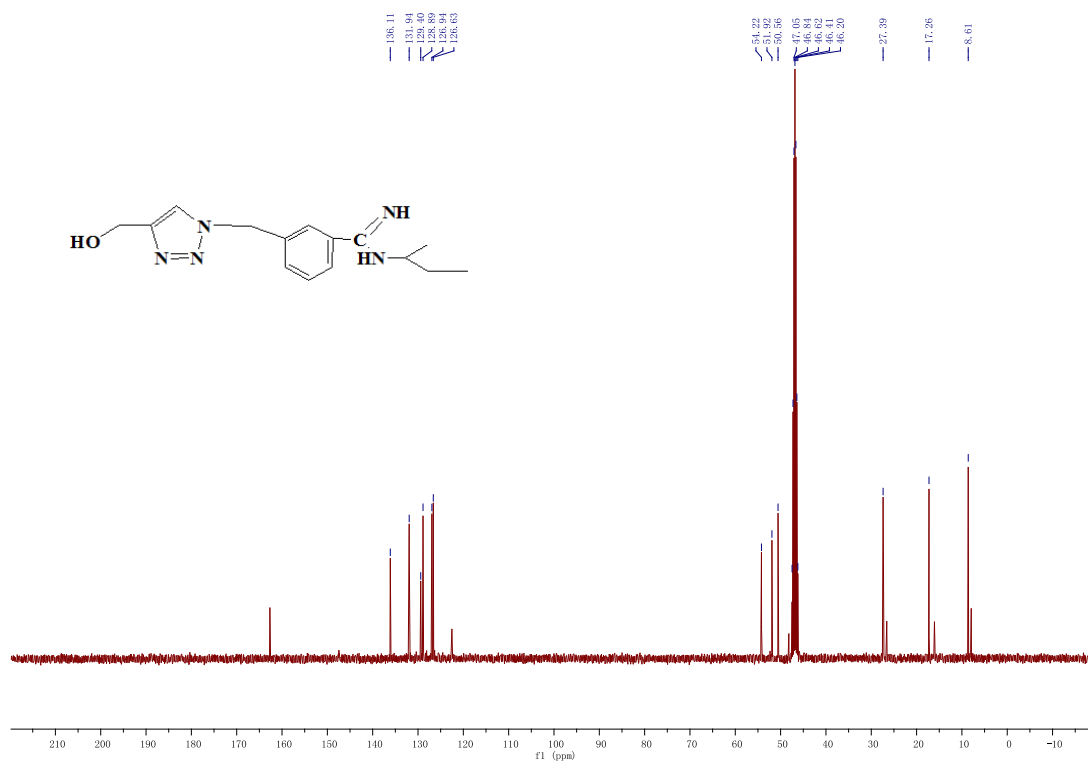

**<sup>1</sup>H-NMR spectrum of compound 17a**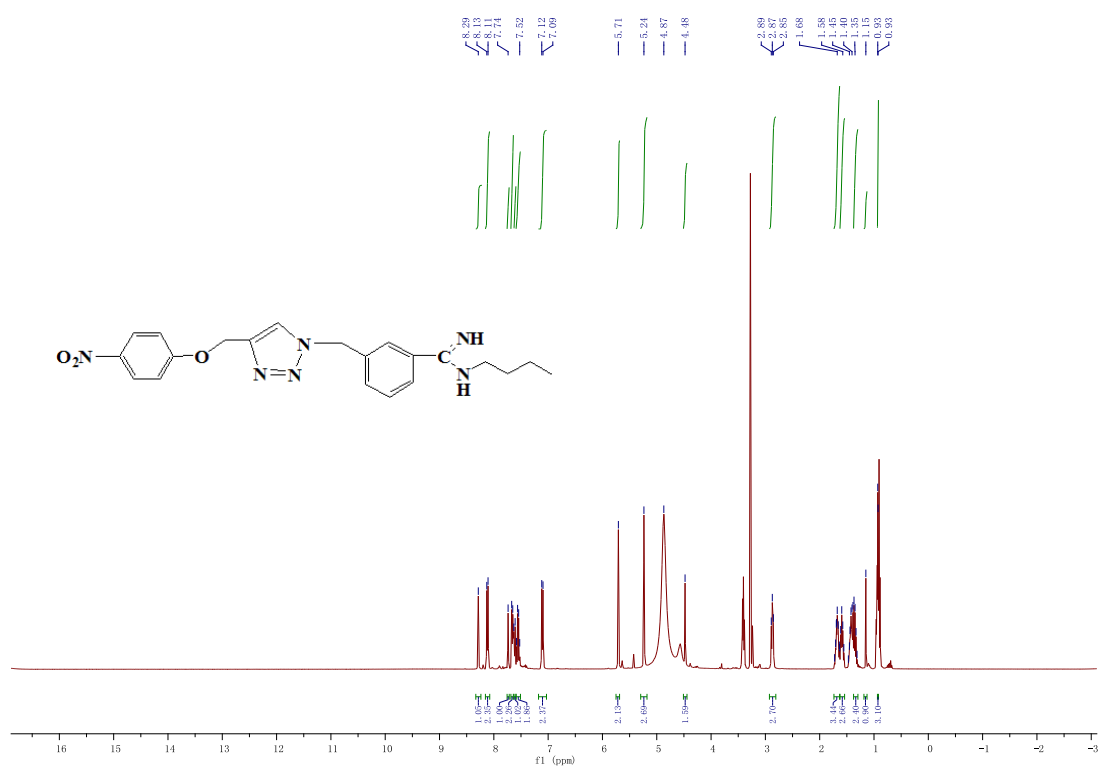**<sup>13</sup>C-NMR spectrum of compound 17a**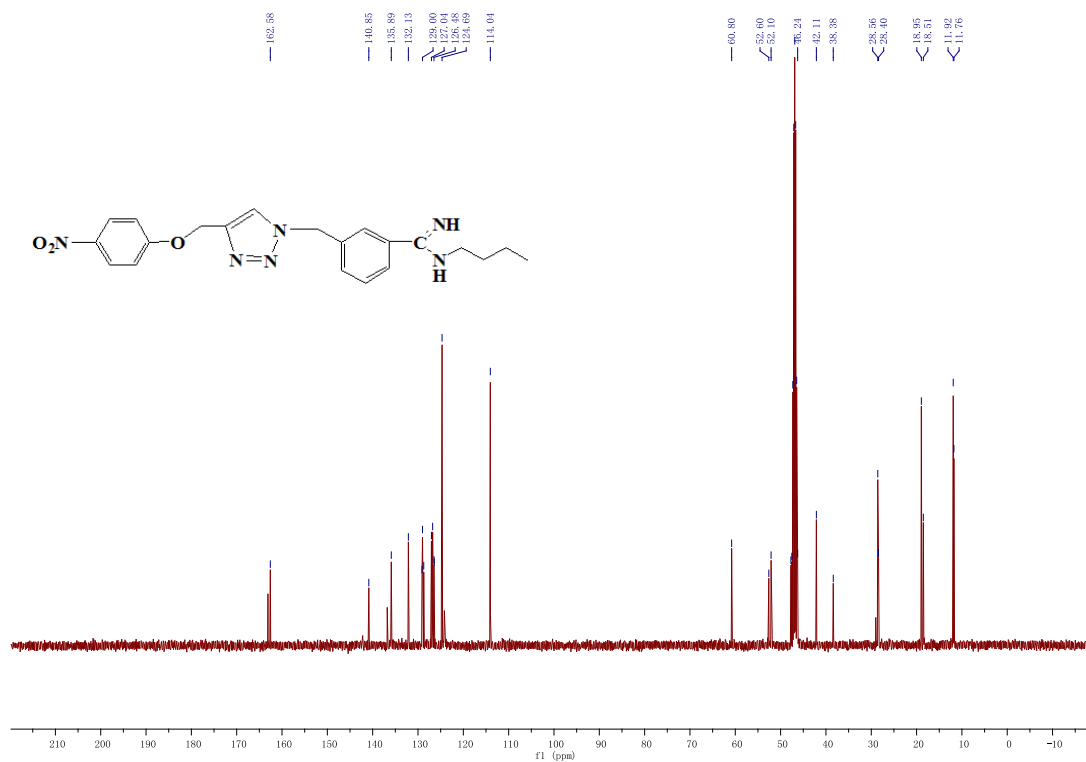

**<sup>1</sup>H-NMR spectrum of compound 17b**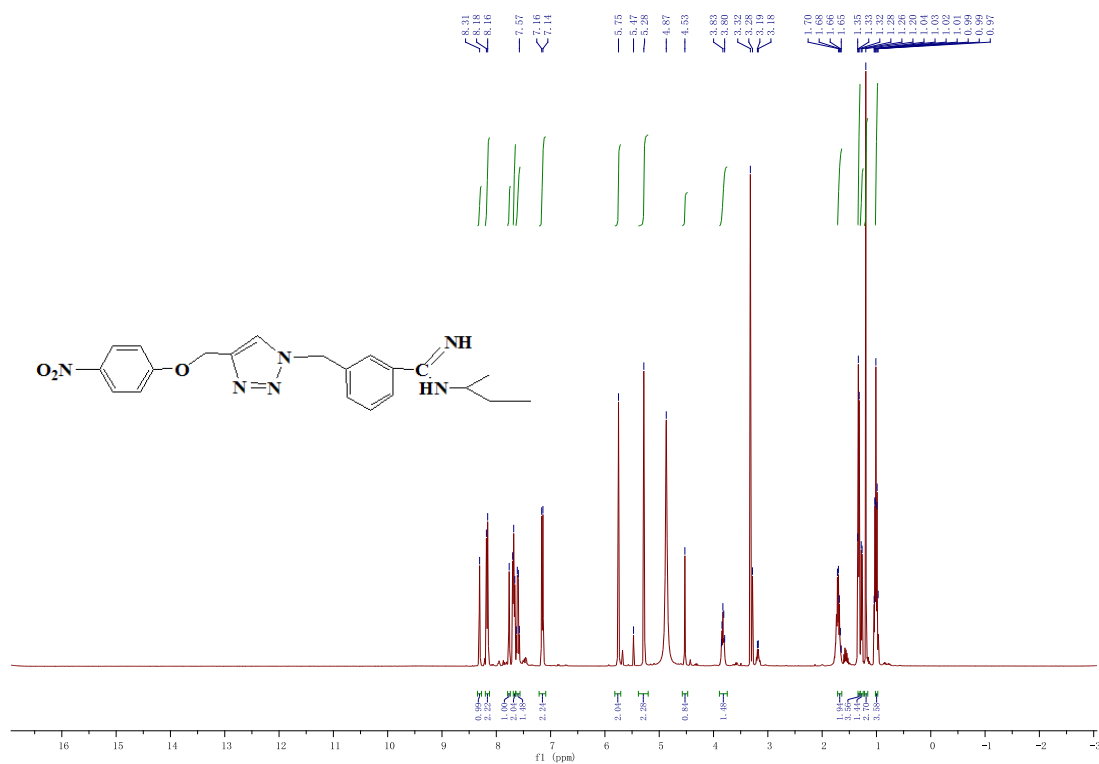**<sup>13</sup>C-NMR spectrum of compound 17b**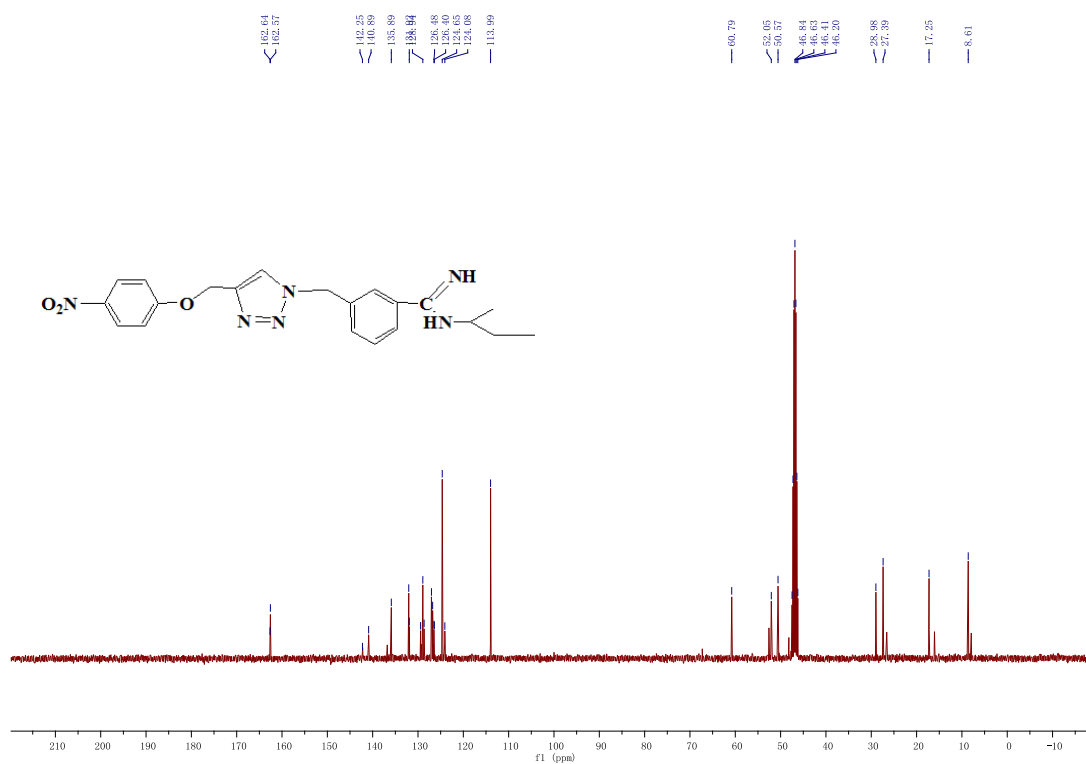

Supplement: molecules-19-05674-s001.pdf [file molecules-19-05674-s001.pdf]
